# Supplementary material
Source: PubMed Central journal article supplement (PMC1502503)

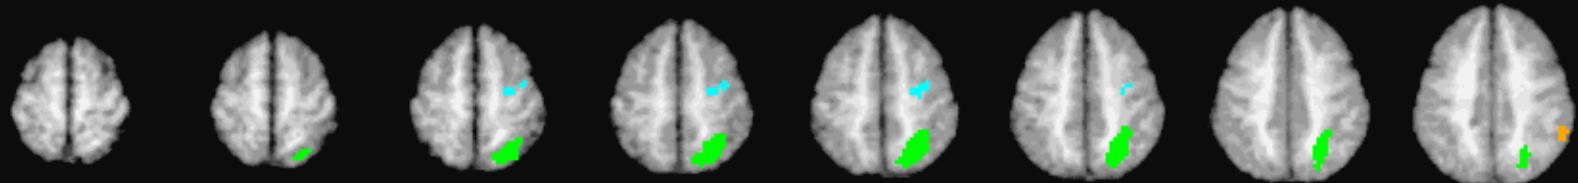

Z = 60

Z = 57

Z = 54

Z = 51

Z = 48

Z = 45

Z = 42

Z = 39

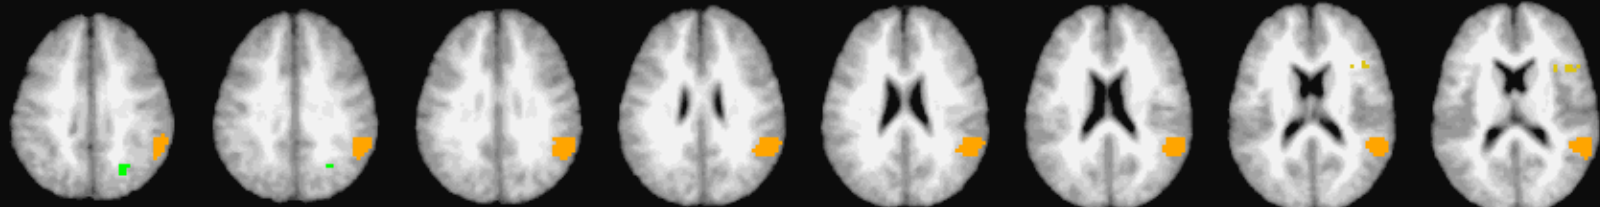

Z = 36

Z = 33

Z = 30

Z = 27

Z = 24

Z = 21

Z = 18

Z = 15

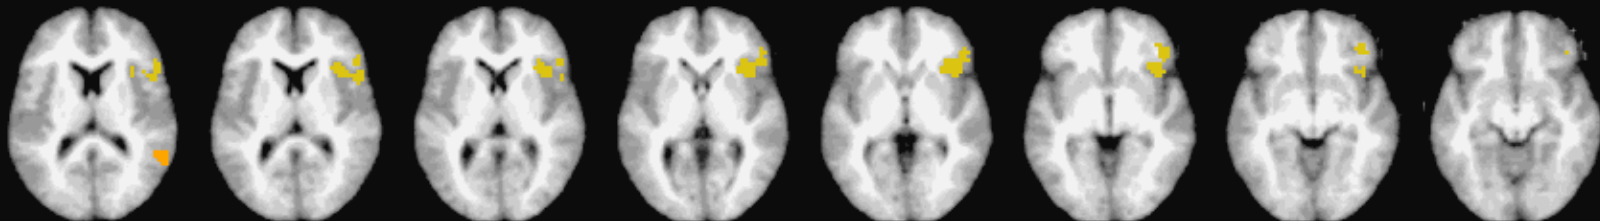

Z = 12

Z = 9

Z = 6

Z = 3

Z = 0

Z = -3

Z = -6

Z = -9

Supplement: pnas_0604187103_1.pdf [file pnas_0604187103_1.pdf]
